# Supplementary material for: A unique network of attack, defence and competence on the outer membrane of the periodontitis pathogen Tannerella forsythia
Source: Royal Society of Chemistry journal article supplement (doi:10.1039/d2sc04166a), 2022-12-12
Supplement: d2sc04166a1.pdf [file d2sc04166a1.pdf]

## SUPPLEMENTARY INFORMATION

### Table of Contents

|                                                                      |           |
|----------------------------------------------------------------------|-----------|
| <b>1. Supplementary results</b>                                      | <b>1</b>  |
| <i>Detailed structural analysis of Tannerella forsythia mirolase</i> | <b>1</b>  |
| <b>2. Supplementary figures</b>                                      | <b>3</b>  |
| Supplementary Figure S1                                              | 3         |
| Supplementary Figure S2                                              | 4         |
| Supplementary Figure S3                                              | 5         |
| Supplementary Figure S4                                              | 6         |
| Supplementary Figure S5                                              | 7         |
| Supplementary Figure S6                                              | 8         |
| Supplementary Figure S7                                              | 9         |
| Supplementary Figure S8                                              | 10        |
| Supplementary Figure S9                                              | 11        |
| <b>3. Supplementary tables</b>                                       | <b>12</b> |
| Supplementary Table S1                                               | 12        |
| Supplementary Table S2                                               | 14        |
| Supplementary Table S3                                               | 15        |
| Supplementary Table S4                                               | 16        |
| Supplementary Table S5                                               | 17        |
| Supplementary Table S6                                               | 18        |
| <b>4. Supplementary references</b>                                   | <b>19</b> |

---

## 1. SUPPLEMENTARY RESULTS

**Detailed structural analysis of Tannerella forsythia mirolase** — The KLIKK-peptidase mirolase is 791 amino acids in length, comprising an 18-residue signal peptide for secretion to the periplasm, a 164-residue N-terminal pro-domain involved in latency maintenance, a 348-residue catalytic domain (CD), and a 261-residue C-terminal extension (UniProt code (UP) A0A0A7KVG3). The latter features an 85-residue C-terminal domain (CTD) for export from the periplasm via a type-IX secretion system (T9SS) and a 176-residue pre-CTD fragment<sup>1</sup>. Based on its CD sequence, mirolase is assigned to the S8 family (subtilases) according to the MEROPS peptidase database (see <https://www.ebi.ac.uk/merops>; <sup>1,2</sup>). The family prototype, subtilisin from *Bacillus subtilis*, is 381 amino acids in length in its pre-pro-form (UP P04189) and was the first bacterial serine endopeptidase (SP) to be characterised, 70 years ago<sup>3</sup>. Subtilisin Novo from *Bacillus amyloliquefaciens*, also termed BPN<sup>7</sup> (UP P00782; 382 residues), and the biotechnologically relevant subtilisin Carlsberg from *Bacillus licheniformis* (UP P00780; 379 residues) are closely related. All have broad substrate specificity and a general preference for aromatic or aliphatic side chains in **P<sub>1</sub>** (substrate and active-site cleft sub-site nomenclature, in bold, according to <sup>4,6</sup>). They are highly efficient and degrade protein substrates at turnover rates  $>1 \times 10^6 \text{ M}^{-1} \text{ s}^{-1}$ <sup>7</sup>. As previously described for subtilisin Novo<sup>8</sup> and other secreted bacterial peptidases<sup>9-14</sup>, mirolase self-activated *in vitro* to yield the mature CD, which remained non-covalently associated with, and inhibited by, its pro-domain until the latter was fully degraded. The enzyme required calcium for self-processing, activity and stability, and displayed optimal activity at pH 9.5. It degraded fibrinogen, haemoglobin and the antimicrobial peptide LL-37, among other physiologically relevant human proteins<sup>1</sup>.

Our analysis of the crystal structure revealed that the mirolase CD belongs to the parallel  $\alpha/\beta$  category<sup>15</sup>. It comprises the central  $\alpha/\beta/\alpha$ -sandwich typical of subtilases, which was first described for subtilisin Novo

(Protein Data Bank code (PDB) 1SBT, <sup>16</sup>) and later for subtilisin Carlsberg (PDB 1SBC <sup>17</sup>). The mirolase CD contains 74 residues more than subtilisin Carlsberg's (25 % of the total) and pivots on a central eight-stranded  $\beta$ -sheet, twisted clockwise by  $\sim 90^\circ$  (see Suppl. Fig. S9A,B). All strands are parallel except edge strand  $\beta 9$ , which is antiparallel and interacts with the C-terminal half of preceding strand  $\beta 8$  while the N-terminal half of  $\beta 8$  interacts with downstream strand  $\beta 10$  in a parallel manner. This results in the overall topology  $\beta 2 \uparrow - \beta 3 \uparrow - \beta 1 \uparrow - \beta 6 \uparrow - \beta 7 \uparrow - \beta 8 \uparrow - \beta 9 \downarrow + \beta 10 \uparrow$ . The sheet is strongly arched between  $\beta 3$  and  $\beta 10$  but not significantly curled. This creates a concave surface, which accommodates six helices ( $\alpha 1 - \alpha 3$  and  $\alpha 6 - \alpha 8$ ), and a convex face, to which two more parallel helices are attached ( $\alpha 4$  and  $\alpha 5$ ). The axes of the latter helices, as well as those of  $\alpha 2$ ,  $\alpha 3$ ,  $\alpha 6$  and  $\alpha 8$ , are roughly antiparallel to the central strands of the sheet.

Mirolase splits into an upper and a lower moiety, which span residues Q<sub>183</sub>-S<sub>356</sub> and S<sub>361</sub>-P<sub>535</sub>, respectively, and are strongly interdigitated. Central sheet strand  $\beta 6$  (I<sub>357</sub>-N<sub>360</sub>) acts as a hinge between the moieties, and the interface between them gives rise to the active-site cleft, which runs left (non-primed side) to right (primed side) on the front surface of the molecule from the perspective of Suppl. Fig. S9B. As in other  $\alpha/\beta/\alpha$ -sandwich enzymes, the active-site cleft is at the C-terminal end of the central sheet and is framed by loops: L $\beta 2\alpha 3$  and L $\beta 3\alpha 4$  delimit the top of the cleft; L $\beta 6\alpha 5$  and L $\beta 7\beta 8$  shape the cleft bottom; and extended loop L $\beta 10\alpha 6$ , which includes  $\beta$ -ribbon  $\beta 11\beta 12$  and calcium site 5 (see discussion of calcium sites below), delineates the cleft on its right side. The left side of the cleft is open. In particular, L $\beta 3\alpha 4$  projects  $\sim 30$  Å from the front surface above the cleft like a unicorn's horn and features the "protruding hairpin"  $\beta 4\beta 5$  (W<sub>318</sub>-Y<sub>335</sub>), which is twisted clockwise by  $\sim 180^\circ$  (Suppl. Fig. S9B). This hairpin is supported by "backing loop 1" (A<sub>250</sub>-N<sub>260</sub>) and "backing loop 2" (P<sub>268</sub>-S<sub>279</sub>; contains calcium site 1) provided by L $\beta 2\alpha 3$ . Overall, these three structural elements comprise 16, 4, and 15 residues more than the equivalent segments of subtilisin Carlsberg, respectively, and they create a unique structure for subtilases (Suppl. Fig. S9B, inset). Further remarkable deviations from subtilisin Carlsberg include an 11-residue insertion between  $\alpha 1$  and  $\alpha 2$ , which accommodates calcium site 2; a five-residue insertion after  $\alpha 5$ ; a four-residue insertion after  $\beta 10$ ; a seven-residue insertion preceding  $\beta 12$ , which includes the aforementioned calcium site 5; and three extra residues within L $\alpha 7\alpha 8$ , which surround calcium site 4.

To gain more insight into the architecture of the cleft, which harbours the typical catalytic triad of subtilase SPs (D<sub>231</sub>, H<sub>283</sub> and S<sub>477</sub>; Suppl. Fig. S9A,B), we obtained a model mimicking a bound substrate by superposing mirolase onto the complex of subtilisin Novo with its pro-domain, which is taken as a substrate complex for subtilisins (PDB 3CO0 <sup>18</sup>; Suppl. Fig. S9B,D). In these SPs, the principal contacts between substrate and enzyme in the cleft are made upstream of the scissile bond by segment P<sub>1</sub>-P<sub>4</sub>, which is pinched between an extended "upper-rim segment" above the cleft, equivalent to G<sub>204</sub>-Y<sub>208</sub> of subtilisin Carlsberg, and an extended "lower-rim segment" below the cleft, equivalent to L<sub>230</sub>-G<sub>232</sub>. Taken together, this yields a characteristic antiparallel three-stranded  $\beta$ -sheet <sup>5, 18, 19</sup>. In mirolase, a substrate would likewise bind in extended conformation, as generally found in the active-site clefts of peptidases <sup>20</sup>. However, although the enzyme possesses a lower-rim segment (S<sub>361</sub>-Y<sub>364</sub>; Suppl. Fig. S9D), which anchors the substrate model (except for the tyrosine side chain in P<sub>4</sub> that clashes with Y<sub>364</sub>), it unexpectedly lacks the upper rim, which is spatially replaced by the protruding hairpin and backing loop 2. This imposes a major difference in the way substrates are bound by mirolase and canonical subtilases.

As to the distinct sub-sites of the cleft, the S<sub>1</sub> specificity pocket would easily accommodate middle-sized hydrophobic or polar — but probably not charged — amino acids in mirolase, which is in accordance with the generally broad substrate specificity of subtilisins. This sub-site would be framed by the backbone of the lower rim and the beginning of L $\beta 7\beta 8$ , and contributing side chains would come from A<sub>396</sub>, G<sub>398</sub>, A<sub>410</sub>, Q<sub>435</sub> and T<sub>476</sub>. In addition, cleft sub-sites S<sub>1</sub>' and S<sub>2</sub>' would be shaped by Y<sub>464</sub>, F<sub>473</sub>, and N<sub>474</sub>; S<sub>2</sub> by D<sub>232</sub> and F<sub>315</sub>; S<sub>3</sub> by N<sub>277</sub> and S<sub>279</sub>; and S<sub>4</sub> by I<sub>314</sub>, I<sub>342</sub>, W<sub>362</sub>, Y<sub>364</sub>, and I<sub>374</sub>. The oxyanion hole characteristic of serine endopeptidases would be formed by S<sub>477</sub>N and T<sub>476</sub>N, as well as the side chain of N<sub>399</sub>, which would stabilise the scissile carbonyl through its amide group like N<sub>155</sub> in subtilisin Carlsberg. The N<sub>399</sub> side chain is further fixed by a tight hydrogen bond between its O $\delta 1$  atom and T<sub>476</sub>O $\gamma 1$  at the cleft bottom (Suppl. Fig. S9D).

Another unique structural feature of mirolase is the presence of six calcium sites distributed around the structure (Suppl. Fig. S9B and Suppl. Table S6). In contrast, subtilisins, kexin, and furin have at most two such cations. Accordingly, mirolase has four unique sites for subtilases, shaped by segments within L $\alpha 1\alpha 2$ , L $\beta 2\alpha 3$ , L $\beta 11\beta 12$  and L $\alpha 7\alpha 8$ , respectively (Suppl. Fig. S9C). These calcium sites constitute an additional regulatory element for mirolase further to zymogenicity to prevent spatially and temporally undesirable activity because the enzyme is inactive in the absence of calcium <sup>1</sup>. This prevents the self-processing and activation of mirolase, which folds in the periplasm as other cargoes of the T9SS. In addition, the calcium sites also provide rigidity to and assist with the correct folding of mirolase <sup>1</sup>.

## 2. SUPPLEMENTARY FIGURES

## A

```

PotA/karilysin:      ...gaaaaacATGAAACAGCAA...AATCAATtaatATGAAACGAT...AAAAAGtgatgccc...
PotB1/miropsin-1:   ...gaaaaacATGAAACAGAAA...TACTCGAAACCATGAAAAAAGA...AAAAAAtgaggaaa...
PotB2/miropsin-2:   ...gaaaaacATGAAGACAAAA...AGTCAtga...ATGAAAAAGA...AAAAAGtgaggaag...
PotC/mirolase:      ...gaaaaacATGAAACAGAAA...ATAAATCCATCATGAAAAAAGA...AAAAAAtgaaaa...
PotD/mirolysin:    ...gaaaaacATGAAACAGAAA...AAGAAtgatcATGAAAAAAA...AAGAAGtgagaaa...
PotE/forsilysin:    ...gaaaaacATGAAACAGCAA...AAtaaaaatcATGAAAAAAC...AAGAAGtgaaaa...

```

## B

```

1
PotA  mkqqiilwigvllllliggvgCKKDQSSCCDKE-----IIKDVSELTGIIISYNT---- 28
PotB1 mkqkiilwigalllltagtgEKNKDYEVPTQ-----LTGTRWELAGIVDAKTG--- 29
PotB2 mktkiilwisslllltagagEKNKDYEVPTQ-----LTGTRWDLAGIVDTKTG--- 29
PotC  mkqkiilwistlllltagagCKKETLPPNQAKGKVLGPTGPCQGYALYIEVENPKGIGLE 40
PotD  mkqkiilwistlllltagagCEKESHASCSE-----CVEEKIPIVTLKNENA---- 28
PotE  mkqqiilwigvllllliggvgCENGQLHSPPAN-----PEQAILGKWELINSGGR--- 29

PotA  -EVKR-----WYISVSDANSYDN-----VTLYFP--CNLDSKYMKEK--EKVIFSG 69
PotB1 -KITPLAPKGCYGFKFISETEAKGGTVLNQMTVHLLTTPPFIGIVTMIGDEENGDAALFY- 87
PotB2 -KITPLAPKGSYWFKFISETKARGSVNLIMAIDLTSPPFFNIETEIGDSHNGDAALFY- 87
PotC  GKGIPAGSGRTWNYRNAISVPLFNRIG--LPVELMEEGTWLHFEYREMTEEEKNRKLFQP 99
PotD  --HFRYIKRRNDFALEIENKELVRG-----LYLIPRGCDIPKKYKEDG--LPVIISG 76
PotE  -PIIP-----TGYREFLPSGIVHK-----YDYTKEQYTSFQCEYSILN--DTVLLMC 73

PotA  QISKSTLKIT-LPAGTTSYCIN---LMSSINKIN-- 98
PotB1 RIIKTLESYT-WEKNELKFFYDNKQYYLLYKYSKP 121
PotB2 RIIRKLESYT-WEKNELKFFYDNKQYYLLYKYSKS 121
PotC  DEPVICLMNQ-IPPPANTYMITKIIAHKPLKINPS 132
PotD  EVFDCSEYIKPWIKRDPVYFIK---LSTIKKK--- 105
PotE  NYRYKYLFYRDKMQLFPLDLIAIRDLTEIYQRKK- 107

```

**Suppl. Fig. S1 — Comparison of potempin genes.** (A) Alignment of the 5′ and 3′ ends of the potempin coding DNA sequences (blue font) preceding the genes of the corresponding KLIKK-peptidases (in yellow) with start codons (ATG) in bold and stop codons framed to show of proximity of the genes (see also Fig. 1 and Suppl. Fig. S2). (B) Alignment of the six mature potempin sequences. For PotB1 and PotB2, identical residues are highlighted in green, signal peptides are in lowercase and residue numbering refers to the mature protein.

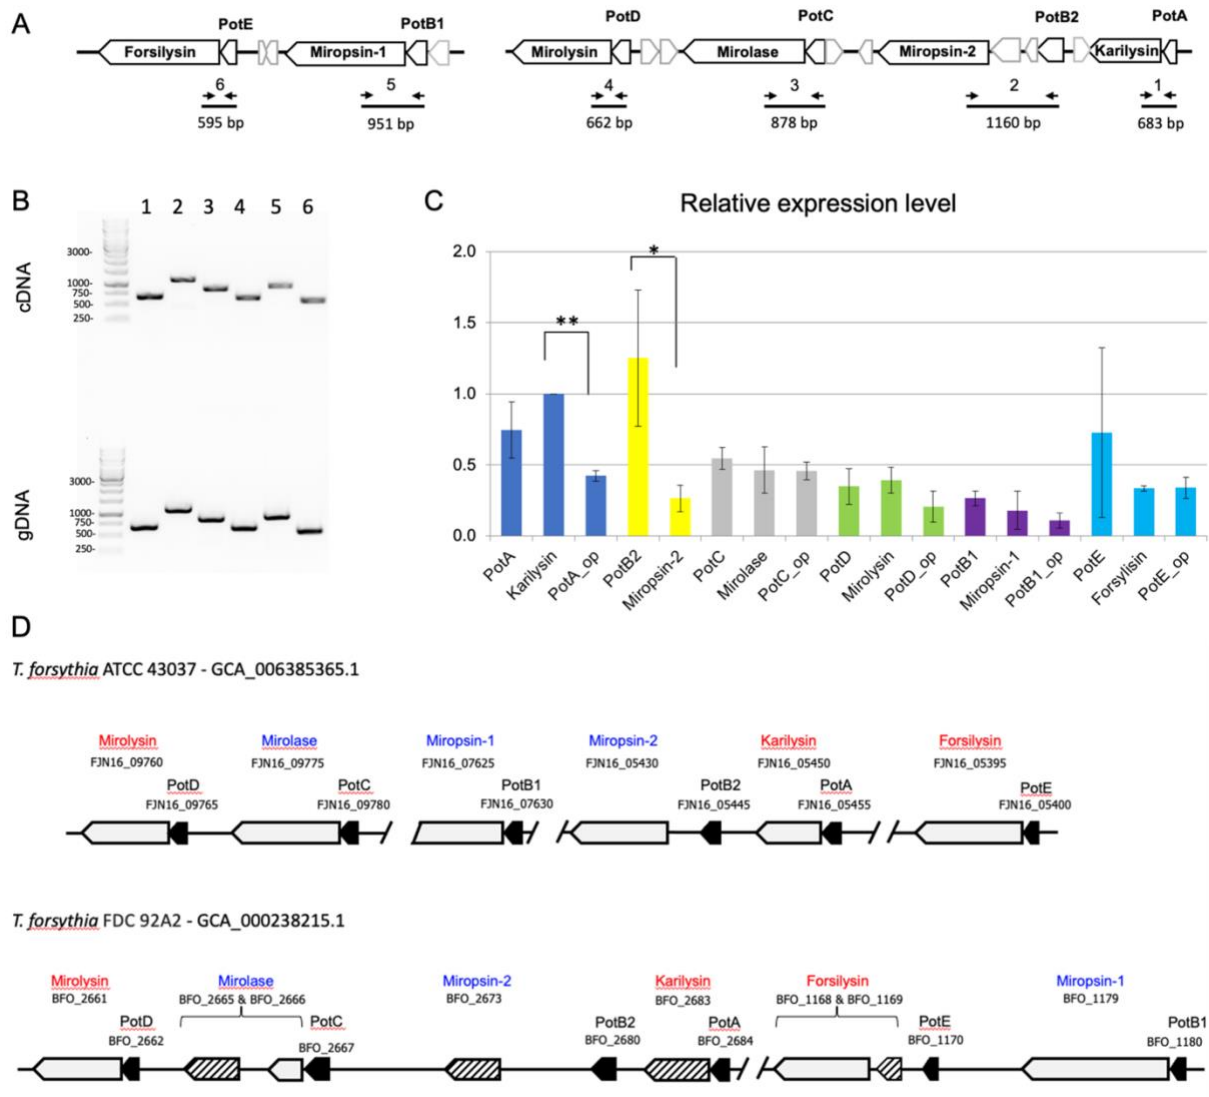

**Suppl. Fig. S2 — KLIKK-peptidases and potempins.** (A) Genomic arrangement of the two loci encoding the six KLIKK-peptidases and their co-transcribed potempins based on manually curated sequences from GenBank (access codes KP715369 and KP715368). For each peptidase:potempin intergenomic region (1–6), the position of the corresponding primers employed (see Suppl. Table S1) is indicated by arrows, as well as the amplicon size in base pairs (bp). Arrows outlined in grey denote other putative ORFs. (B) *Tannerella forsythia* mRNA was extracted in the middle of the exponential growth phase, residual genomic DNA was digested with DNase I and the pure mRNA was reverse transcribed into cDNA. Amplicons 1–6 from cDNA (upper panel) and genomic (g) DNA (lower panel) for each of the six intergenomic regions of (A) are shown next to the GeneRuler 1-kb DNA ladder (Thermo Fisher Scientific). (C) Comparative SYBR Green-based qRT-PCR analysis of transcript expression levels for each potempin, KLIKK-peptidase, and inhibitor:peptidase operon relative to karilysin (primers are listed in (Suppl. Table S1)). Data are means  $\pm$  SD ( $n = 3$  technical replicates) and are representative of three experiments. Statistical significance was determined by a one-way analysis of variance (ANOVA) using Tukey's honest significance difference test (\* =  $p < 0.05$ ; \*\* =  $p < 0.01$ ). (D) Erroneous arrangement of potempin and KLIKK-peptidase loci in the genomic sequences of two *T. forsythia* strains deposited with GenBank under codes GCA\_006385365.1 and GCA\_000238215.1. These errors arose from the highly repetitive nature of the *T. forsythia* genome, which hampers unambiguous gene assembly based on the short reads generated by Illumina sequencing. For example, the KLIKK-peptidases share a  $\sim 700$ -bp identical segment, which precludes correct assembly. Moreover, the percentage of A/T bases in non-coding regions is very high due to the unique mechanisms of gene expression regulation within the Bacteroidetes phylum. Similar problems were reported during the genome assembly and annotation of *Porphyromonas gingivalis*<sup>21</sup>. Black arrows represent potempin genes, white arrows stand for KLIKK-peptidase genes and dashed arrows denote pseudogenes.

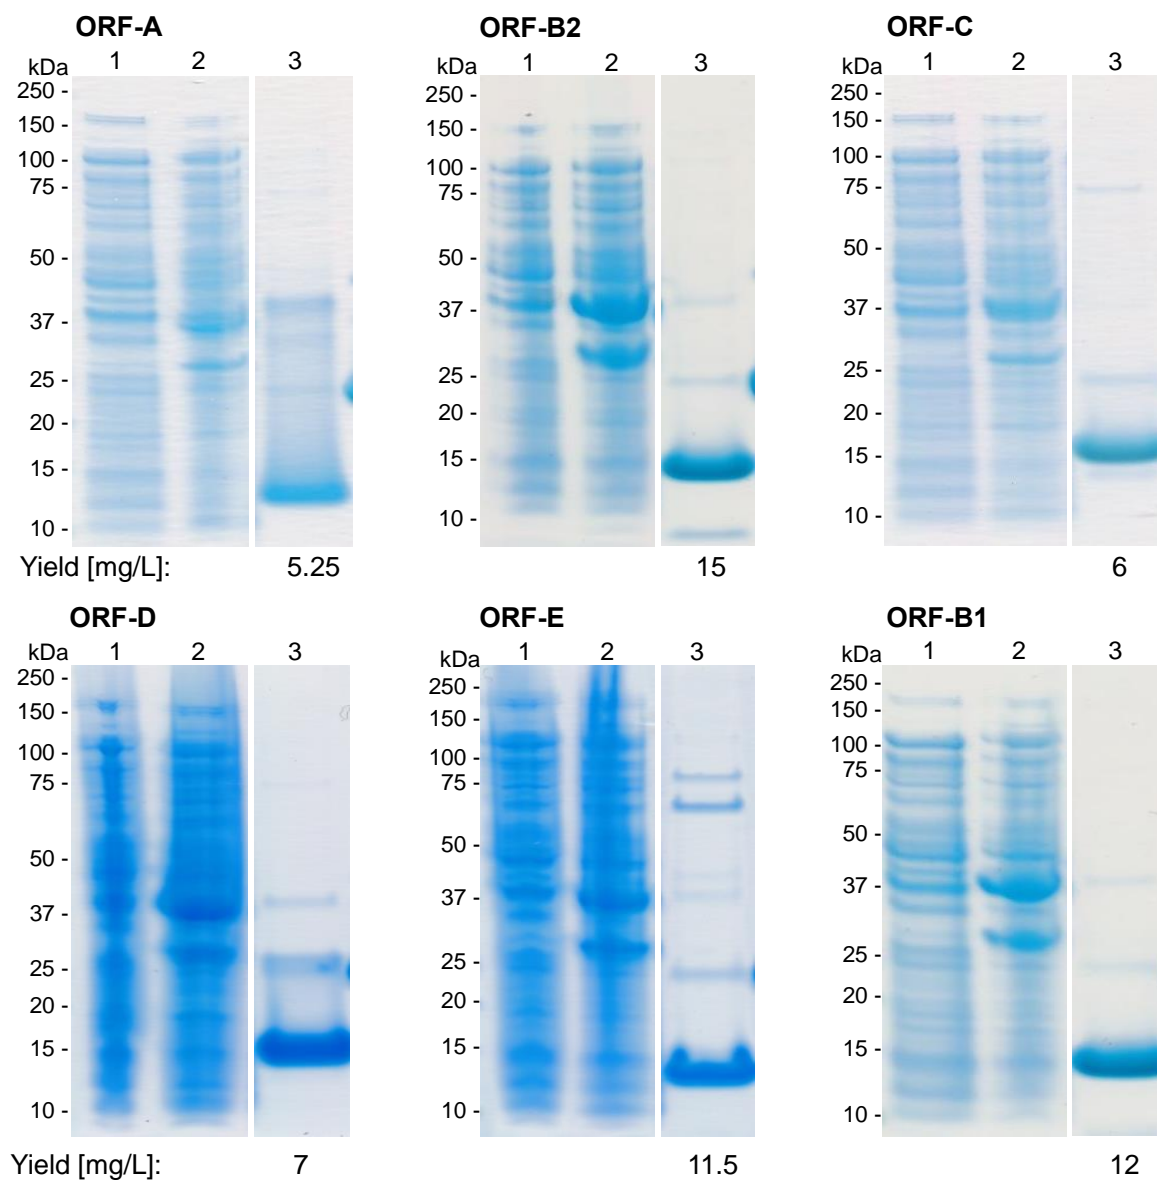

**Suppl. Fig. S3 — Expression and purification of potempins.** All six genes were amplified and cloned in expression vector pGEX-6P-1 without the predicted signal peptide for expression in *Escherichia coli* BL21 cells. The resulting GST-fusion proteins were immobilised on glutathione Sepharose 4 fast flow resin and digested with PreScission protease to elute the tag-free proteins. For each potempin, lanes 1 and 2 show cellular extracts before and 6 h after induction, and lane 3 shows the eluted tag-free proteins.

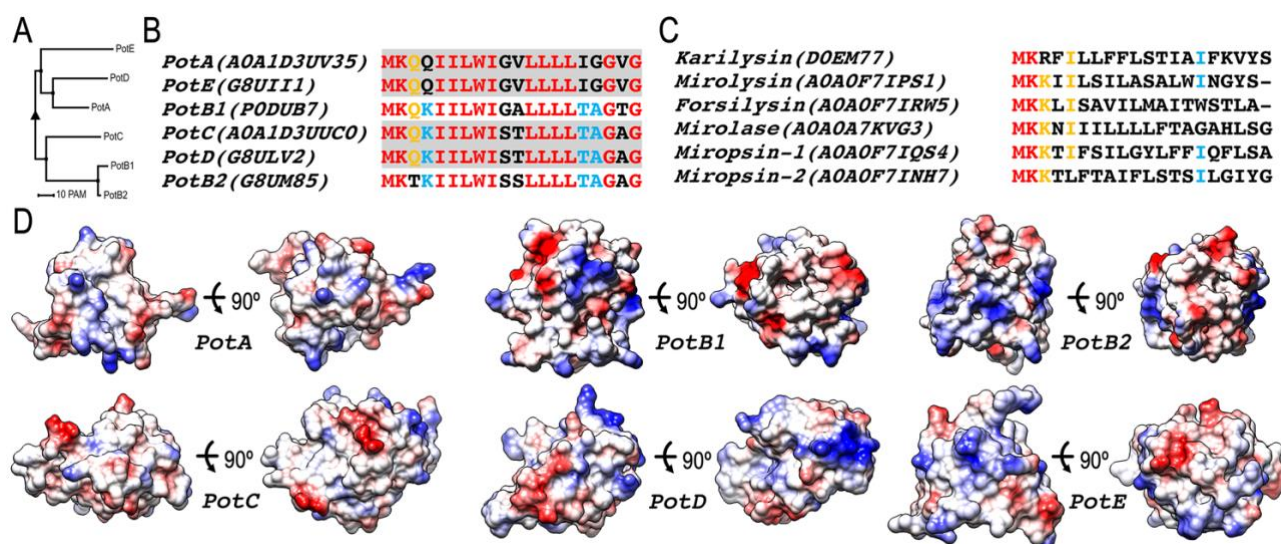

**Suppl. Fig. S4 — Phylogenetic analysis of the potempins and their signal peptides, and Coulombic surfaces. (A)** Sequence-based phenogram of the potempins. The horizontal bar represents 10 point accepted mutations (PAM). **(B)** Sequence alignment of the 20-residue signal peptides of the potempins. Identical residues in all six sequences are shown in red, whereas positions with five and four conserved residues are shown in orange and blue, respectively. Identical sequences are grouped and highlighted in grey. UniProt codes are shown in parentheses. **(C)** Sequence alignment of the 19/20-residue signal peptides of KLIKK-peptidases, with the same colour coding as in (B). **(D)** Coulombic surfaces of the potempins in the two orthogonal orientations of Fig. 6, respectively.

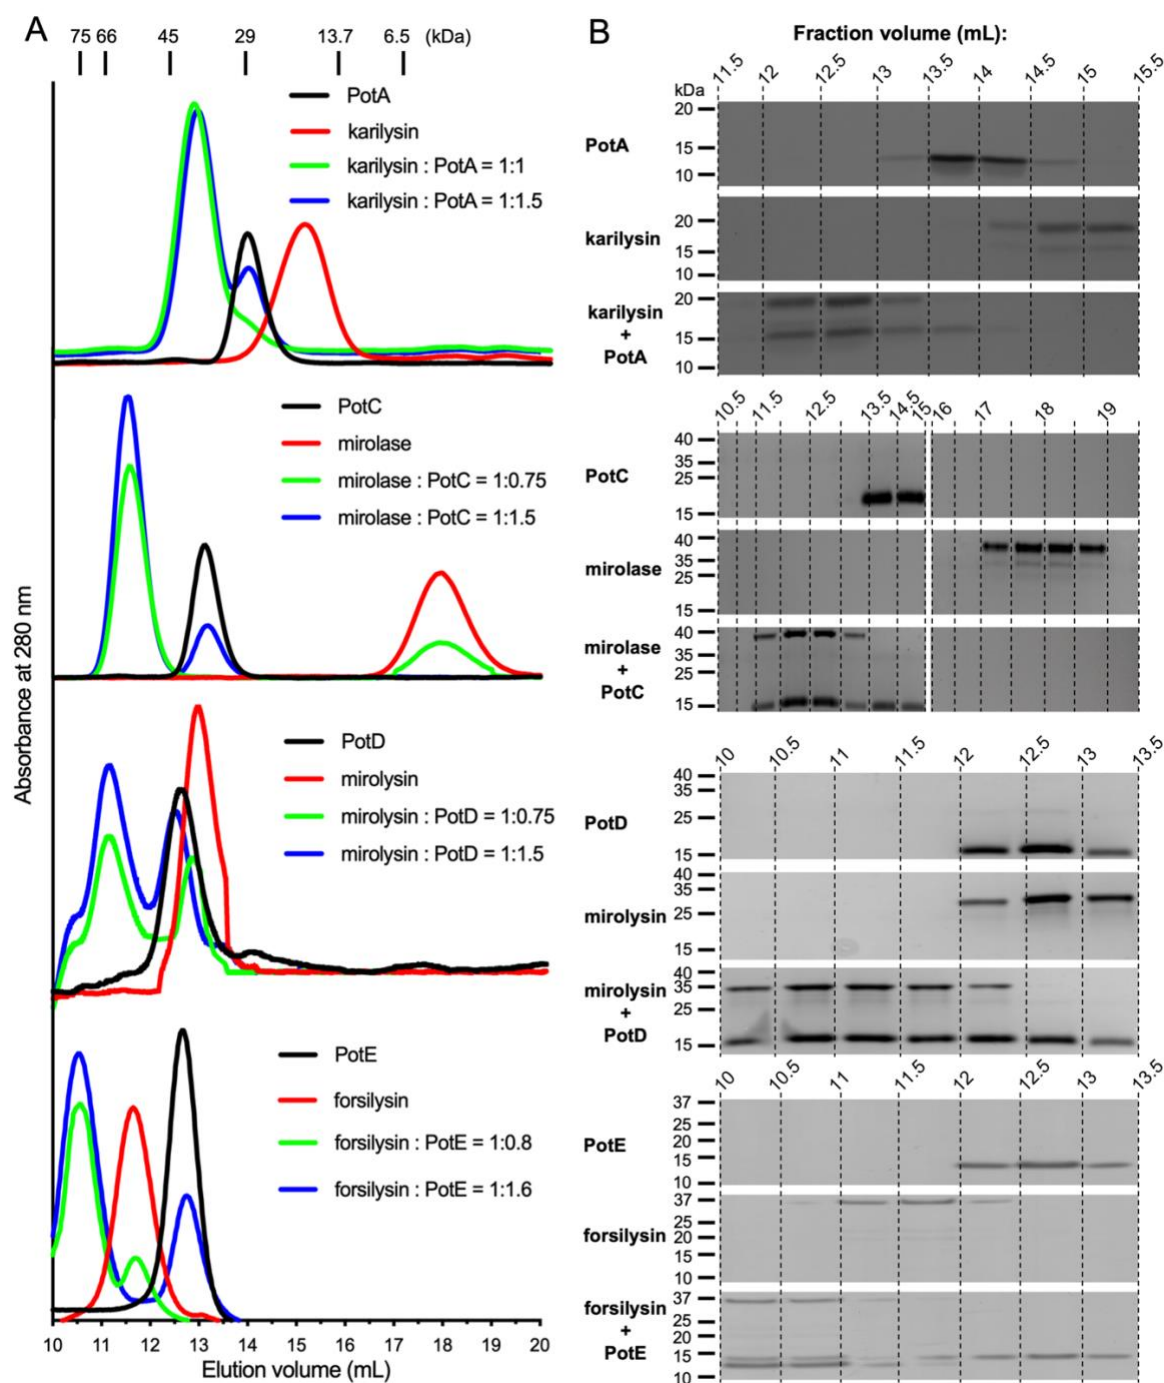

**Suppl. Fig. S5 — Stability of peptidase:inhibitor complexes.** (A) Assessment of 1:1 complex formation by size-exclusion chromatography (SEC) and (B) SDS-PAGE. Inhibitors (PotA, PotC, PotD and PotE) and peptidases (karilysin, mirolase, mirolysin and forsilysin) were incubated separately or together (karilysin+PotA, mirolase+PotC, mirolysin+PotD and forsilysin+PotE) at two different molar ratios for 15 min and loaded onto a calibrated Superdex 75 10/300 GL SEC column. Fractions at relevant retention volumes (lower *x*-axis in A) of the distinct runs (inhibitor only = black, peptidase only = red, mixtures = blue and green) were analysed by SDS-PAGE (B) to verify the presence of peptidases and inhibitors matching the anticipated molecular masses.

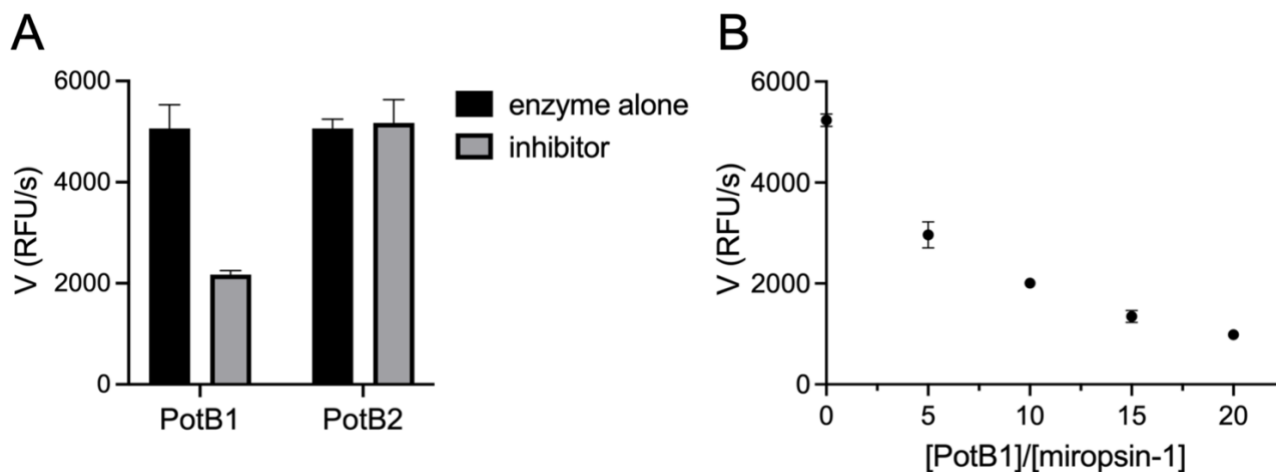

**Suppl. Fig. S6 — Miropsin-1 inhibition by PotB1.** The trypsin-like serine peptidase is inhibited by PotB1 but not the closely-related PotB2 (see also Suppl. Figs. S1B and S4A). **(A)** Miropsin-1 was pre-incubated with a 10-fold molar excess of PotB1 or PotB2 for 15 min, and residual enzyme activity on fluorescein-labelled casein (FTC-casein) was determined as the initial velocity ( $V$ ) of fluorescence release. **(B)** Concentration-dependent inhibition of miropsin-1 by PotB1 at inhibitor:peptidase ratios of 5:1–20:1. Data are means  $\pm$  SD ( $n = 3$  technical replicates).



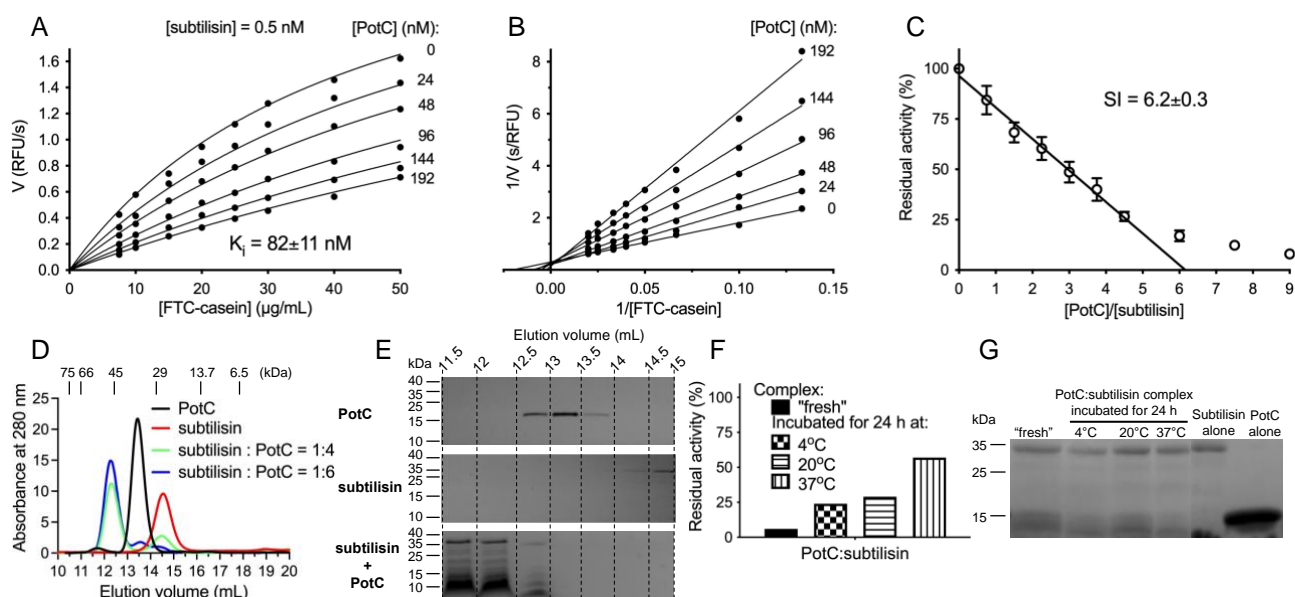

**Suppl. Fig. S7— PotC inhibits subtilisin Carlsberg.** (A) Subtilisin was incubated with increasing amounts (0–192 nM) of PotC for 15 min, and the velocity ( $V$ ) in relative fluorescence units (RFU)  $s^{-1}$  of the cleavage of FTC-casein at different concentrations was recorded. The readings are the average of two technical replicates, and the  $K_i$  values are means  $\pm$  SD from three experiments. (B) The reciprocal of the reaction velocity ( $1/V$ ) was plotted against the inverse of the substrate concentration, which revealed reversible competitive inhibition and an apparent  $K_i$  value of  $82 \pm 11$  nM. (C) To determine the stoichiometry of inhibition (SI), subtilisin was pre-incubated with increasing amounts of PotC for 15 min. The residual enzyme activity was determined with Azocoll as the substrate and was plotted against the inhibitor:peptidase molar ratio as a percentage of the activity of the isolated peptidase. Data are means  $\pm$  SD ( $n = 3$ ). (D) Calibrated SEC in a Superdex 75 10/300 GL column of PotC (black), subtilisin (red), and pre-incubated mixtures of subtilisin:PotC at molar ratios of 1:4 (green) and 1:6 (blue), which reveal complex formation. (E) Relevant fractions of (D) were analysed by SDS-PAGE, which revealed the presence of the component proteins and their molecular mass. (F) The subtilisin:PotC complex was obtained at a 1:6 molar ratio and incubated at different temperatures for 48 h. The residual activity of the peptidase was determined with Azocoll as the substrate compared to the “fresh” complex (15 min incubation at room temperature), taking the activity of isolated subtilisin as 100%. (G) SDS-PAGE analysis of (F) showing proteolytic degradation of most PotC during the inhibitor reaction with subtilisin, which explains the high SI.

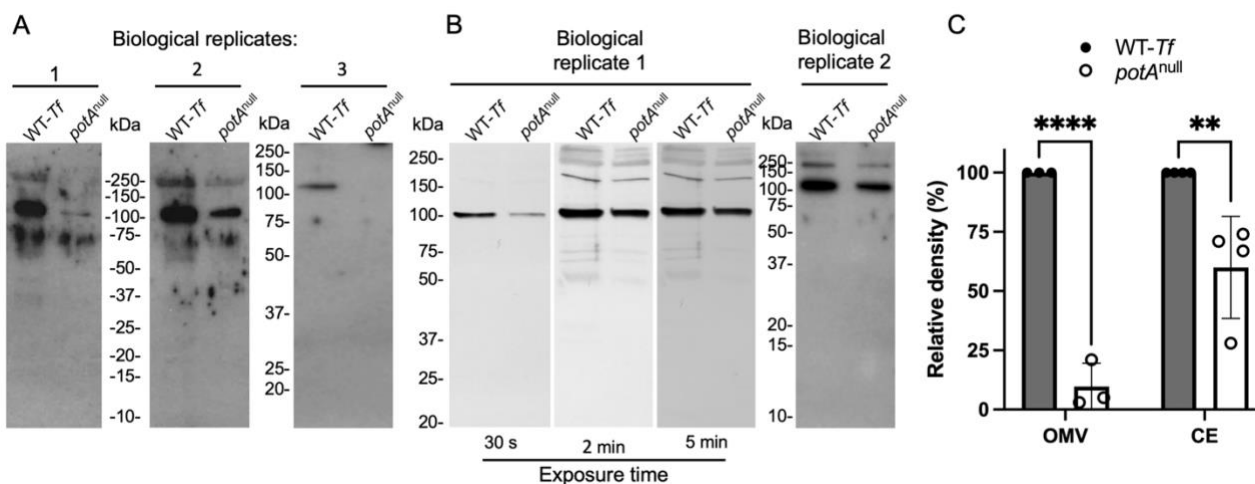

**Suppl. Fig. S8 – BspA as a marker for PotA activity.** Densitometry analysis of the intensity of the BspA immunoreactive band in the (A) outer-membrane vesicles (OMVs; three biological replicates) and (B) cell envelope (CE; two biological replicates) of wild-type *T. forsythia* (WT-Tf) and the isogenic PotA-deficient mutant (*potA*<sup>null</sup>). (C) Bands were scanned and their intensity was analyzed using the ImageJ program (<https://imagej.nih.gov/ij>). The intensity of the band from WT-Tf was taken as 100%. Data are means  $\pm$  SD [n = 3 (OMV) and 4 (CE)]. Statistical significance of difference was determined employing 2-way ANOVA with Šidák's multiple comparisons test (\*\*p<0.01; \*\*\*\*p<0.0001).

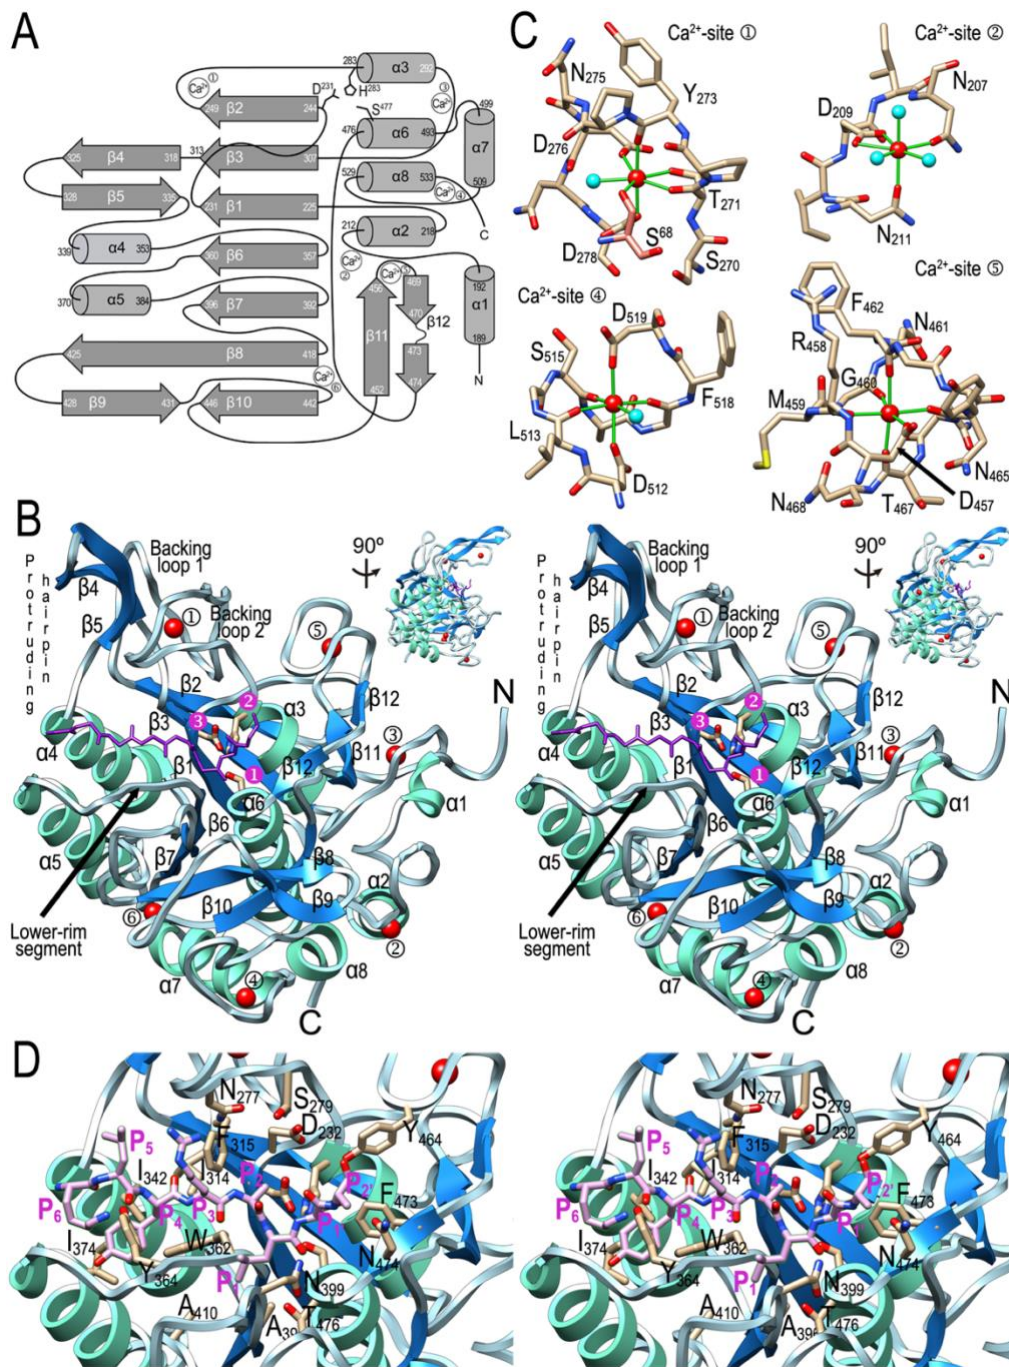

**Suppl. Fig. S9 — Structure of mirolase.**

(A) Topology scheme of mirolase depicting the 12 strands ( $\beta 1$ – $\beta 12$ ) and the eight helices ( $\alpha 1$ – $\alpha 8$ ) of the structure with the flanking residue numbers, as well as the six calcium-binding sites (①–⑥). Strand  $\beta 12$  is interrupted by a bulge. (B) Richardson-type plot in cross-eye stereo of mirolase viewed perpendicular to the active-site cleft, which runs horizontally from left (non-primed side) to right (primed side). The strands (blue arrows) and the helices (aquamarine ribbons) are shown and labelled, as well as the six calcium sites (red spheres, labelled ①–⑥). The residues of the catalytic triad (D<sub>231</sub>, H<sub>238</sub> and S<sub>477</sub>) are shown as sticks in white over magenta (①–③). The “protruding hairpin”, “backing loop 1”, “backing loop 2”, and “lower-rim segment” are labelled for reference. A model subtilase substrate was derived from PDB 3CO0<sup>18</sup>. Residues K<sub>72</sub>–A<sub>79</sub> from the latter structure are displayed

for their main chain (in purple) to map the active-site cleft of mirolase after optimal superposition of the catalytic domains. An orthogonal view of the catalytic domain is provided in the top-right inset. (C) From left to right and from top to bottom, close-up views of the four calcium-binding sites depicted in (B) that have not been found thus far in subtilisins or kexin (①, ②, ④ and ⑤). The chain segments of mirolase displayed are S<sub>270</sub>–D<sub>278</sub>, N<sub>207</sub>–N<sub>211</sub>, D<sub>512</sub>–D<sub>519</sub> and D<sub>457</sub>–N<sub>468</sub>, respectively. Calcium ions are shown in red, solvent molecules in cyan, and ion-coordinating atoms are linked with a green line (see also Suppl. Table S6). (D) Close up of (B) around the active site, highlighting selected residues that shape the cleft sub-sites as stick models with carbons in tan and black labels (except for the catalytic triad, for clarity). A full-atom substrate model is shown with carbons in pink (labelled P<sub>6</sub>–P<sub>2</sub>’ in magenta).

## 3. SUPPLEMENTARY TABLES

| <b>Suppl. Table S1. List of primers (5'→3'), strains and plasmids used in this study.</b> |                                               |
|-------------------------------------------------------------------------------------------|-----------------------------------------------|
| <b>Primers for cloning</b>                                                                |                                               |
| <b>pGEX-6P-1-PotA</b>                                                                     |                                               |
| pGEX_2684F                                                                                | CACGGATCCGCAAAGAAAGATCAGTCTTCTTGTT            |
| pGEX_2684R                                                                                | ATTGCGGCCGCTTAATTGATTTTATTGATTGAC             |
| <b>pGEX-6P-1-PotB1</b>                                                                    |                                               |
| pGEX_1181F                                                                                | CACGGATCCGCGGAGAAGAACAAGGACTACGAG             |
| pGEX_1181R                                                                                | ATTGCGGCCGCTCATGGTTTCGAGTATTTATAAAG           |
| <b>pGEX-6P-1PotB2</b>                                                                     |                                               |
| pGEX_2682F                                                                                | CACGGATCCGCGGAGAAGAACAAGGACTACGA              |
| pGEX_2682R                                                                                | ATTGCGGCCGCTCATGACTTCGAGTATTTATAAAG           |
| <b>pGEX-6P-1-PotC</b>                                                                     |                                               |
| pGEX_2667F                                                                                | CACGGATCCGCAAAGAAAGAAACACTTCCTCC              |
| pGEX_2667R                                                                                | ATTGCGGCCGCTCATGATGGATTTATTTTAAATG            |
| <b>pGEX-6P-1-PotD first PCR</b>                                                           |                                               |
| pGEX_2662F                                                                                | GACGAATTCGCTGAGAAAGAAAGCCATGCCTC              |
| 2662OpR_RT-PCR                                                                            | CCAATCCGTTATCCGCTGGT                          |
| <b>pGEX-6P-1-PotD nested PCR</b>                                                          |                                               |
| pGEX_2662F                                                                                | GACGAATTCGCTGAGAAAGAAAGCCATGCCTC              |
| pGEX_2662R                                                                                | ATTGCGGCCGCTCATTCTTTTTTATAGTTGATAATTTAATA     |
| <b>pGEX-6P-1-PotE</b>                                                                     |                                               |
| pGEX_1170F                                                                                | CACGGATCCGCGGAGAATGGACAGTTGCATT               |
| pGEX_1170R                                                                                | ATTGCGGCCGCTATTTTTTACGTTGATAAATTTCTG          |
| <b>pKO-PotA</b>                                                                           |                                               |
| KOPINA_pUC19R                                                                             | CAGCGGATCCTCTAGAGTCGACCTG                     |
| KOPINA_UPF                                                                                | CTAGAGGATCCGCTGGAAAGACGAAG                    |
| KOPINA_UPR                                                                                | GAAGCTGCAGCGCATAACAATTAACAACACTGAAT           |
| KOPINA_ermF                                                                               | ATGCGCTGCAGCTTCCGCTATTGCTTT                   |
| KOPINA_ermR                                                                               | GTACCACGCATGCAATTTGCCAGCCGTTATG               |
| KOPINA_DWF                                                                                | AATTGCATGCGTGGTACACGCCGAAT                    |
| KOPINA_DWR                                                                                | CCAGTGAATTCAACTCTCGACAGTCAGTGAAT              |
| KOPINA_pUC19F                                                                             | GAGTTTGAATTCAGTGGCCGTCGTT                     |
| <b>pdelKO-PotA</b>                                                                        |                                               |
| DelKopin2F                                                                                | ATGAAACGATTTATTCTTTTGT                        |
| DelKopin2R                                                                                | CAAAAGAATAAATCGTTTCATGTTTTTCTATTTTTATAA       |
| <b>pKO-PotA_C21A</b>                                                                      |                                               |
| LipA2Rs                                                                                   | TCCTATCAGCAGAAGCAGGAC                         |
| LipA2Rt                                                                                   | TTTCTTAGATCCCACTCCTCTATCAGCAGAAGCAGGAC        |
| LipA2Fs                                                                                   | GATCAGTCTTCTTGTGTGATAAAG                      |
| LipA2Ft                                                                                   | GGAGTGGGATCTAAGAAAGATCAGTCTTCTTGTGTGATAAAG    |
| <b>PCR operon primers</b>                                                                 |                                               |
| PINEopF/ PINEopR                                                                          | CTTCCATCGGGTATTGTTCA / TGTCCGGTAATAGAAGGCTTG  |
| PINB1opF / PINB1opR                                                                       | TTACTAACAGCAGGAACGGGA / TGTATCCATAGTCGATGCGAG |
| PINDopF / PINDopR                                                                         | ATACAAAGAAGATGGCCTCCC / TCGCCTAAATTACAGACCCAG |
| PINCopF / PINCopR                                                                         | CACTTCGAATATCGGGAGATG / CATATCTTCGTGCGCCTCTAC |
| PINB2opF / PINB2opR                                                                       | AGCTCGAATCGTACACATGG / TACATCGAGAGGAGGCATTG   |
| PINAopF / PINAopR                                                                         | ATGGTATATCTCGGTGTCCGA / TAGATGACCGATCTCATGTGC |
| <b>qRT-PCR primers</b>                                                                    |                                               |
| <b>SSU</b>                                                                                |                                               |
| 16STFqPCR_F / 16STFqPCR_R                                                                 | CCTGGTAGTCCACGCAGTAA / GTCAGGGTTGCGCTCGTTAT   |
| <b>PotA</b>                                                                               |                                               |
| 2684F_RT-PCR / 2684R_RT-PCR                                                               | TAGGTGTCCTGCTTCTGCTG / ACTATTCGCATCGGACACCG   |

|                                                  |                                                                                              |                           |
|--------------------------------------------------|----------------------------------------------------------------------------------------------|---------------------------|
| <b>Karilysin</b>                                 |                                                                                              |                           |
| 367f2 / 367rqRT                                  | GGGAATCATGGTGACGGATATCC / GATGACCGATCTCATGTGCCG                                              |                           |
| <b>PotA<sub>op</sub></b>                         |                                                                                              |                           |
| 2684OpR_RTPCR / 2684OpF_RTPCRn                   | GGCCATTATCGTATAGGCGCT / ACTTCCTGCGGGAACAACCT                                                 |                           |
| <b>PotB2</b>                                     |                                                                                              |                           |
| PINB2F_RTPCR / PINB2R_RTPCR                      | CGAGGTTCCCTACGCAACTGA / AACCAGTAGCTGCCTTTCGG                                                 |                           |
| <b>Miropsin-2</b>                                |                                                                                              |                           |
| 364seqF2 / 364rqRT                               | ATCCAACGAAGAAGGAGATATGC / CCGAACTTCCTATCTGACCG                                               |                           |
| <b>PotC</b>                                      |                                                                                              |                           |
| 2667F_RTPCR / 2667R_RTPCR                        | AGCTTATGGAAGAGGGCACG / GGTATTGGCTGGAGGTGGAA                                                  |                           |
| <b>Mirolase</b>                                  |                                                                                              |                           |
| 347fqRT / 347rqRT                                | GAATACATCCGTAAGAGTAGCGG / AGGGCTGTCATTGTCTGTTTCGG                                            |                           |
| <b>PotC<sub>op</sub></b>                         |                                                                                              |                           |
| PINCopR_RTPCR / PINCopF_RTPCR                    | GTCTGATGCGACGATACGGA / AGCTTATGGAAGAGGGCACG                                                  |                           |
| <b>PotD</b>                                      |                                                                                              |                           |
| 2662F_RTPCR / 2662R_RTPCR                        | GAGCGGGGTGTGAGAAAGAA / CCCGTTTAATCCACGGCTTG                                                  |                           |
| <b>Mirolysin</b>                                 |                                                                                              |                           |
| 341fqRT / 341rqRT                                | CTCGTAGTGTGCCTTCTCCAC / GCCTGATCGGCATTCATTTCGG                                               |                           |
| <b>PotD<sub>op</sub></b>                         |                                                                                              |                           |
| 2662OpF_RTPCR / 2662OpR_RTPCR                    | CCCGCGGATGTGATATTCT / CCAATCCGTTATCCGCTGGT                                                   |                           |
| <b>PotB1</b>                                     |                                                                                              |                           |
| PINB1F_RTPCR / PINB1R_RTPCR                      | GGAACGGGATGCGAGAAGAA / AATCCGTAGCAGCCTTTGGG                                                  |                           |
| <b>Miropsin-1</b>                                |                                                                                              |                           |
| 2174qRT2F / 2174qRT2R                            | ACGATAAGTTCTTGTTCCT / GCACCGTTTGATTTCGTTATT                                                  |                           |
| <b>PotB1<sub>op</sub></b>                        |                                                                                              |                           |
| PINB1opF_RTPCR / PINB1opR_RTPCR                  | GCCGATTGTTCTATCGCATT / AGACGGAGTGCTACCAAAGC                                                  |                           |
| <b>PotE</b>                                      |                                                                                              |                           |
| PINEF_RTPCR / PINER_RTPCR                        | GGTGTCTGCTTCTGCTGAT / TCCCAAGATTGCCTGTTC                                                     |                           |
| <b>Forsylisin</b>                                |                                                                                              |                           |
| Fors. qPCR2162F / Fors. qPCR2162R                | GAGTCTGCGAATGACTGAACCAG/CTGTAATGCCACTGCACGTCC                                                |                           |
| <b>PotE<sub>op</sub></b>                         |                                                                                              |                           |
| PINEopF_RTPCR / PINEopR_RTPCR                    | TGCCATACGCGATCTTACAG / CCCGTTATCATCTGCCGAA                                                   |                           |
| <b>Bacterial strains</b>                         | <b>Description (genotype, resistance)</b>                                                    | <b>Source / reference</b> |
| <i>Escherichia coli</i> DH5α                     | General cloning host                                                                         | Thermo Fisher Scientific  |
| <i>Escherichia coli</i> BL21 (DE3)               | Expression of PorU protein                                                                   | EMD-Millipore             |
| <i>Tannerella forsythia</i> WT                   | Wild-type strain                                                                             | ATCC 43037                |
| <i>Tannerella forsythia</i> Δkly                 | Kar:: <i>ermF</i> ; Em <sup>r</sup>                                                          | <sup>22</sup>             |
| <i>Tannerella forsythia</i> potA <sup>null</sup> | potA:: <i>ermF</i> ; Em <sup>r</sup>                                                         | This study                |
| <b>Plasmids</b>                                  |                                                                                              |                           |
| pURgpB-E                                         | Source of the <i>ermF</i> cassette                                                           | <sup>23</sup>             |
| pKO-PINA-ermF                                    | The master plasmid for <i>potA/kar</i> operon modification in the <i>T. forsythia</i> genome | This study                |
| pdelKO-PINA                                      | Plasmid for <i>potA</i> deletion in the <i>T. forsythia</i> genome                           | This study                |
| pKO-PotA_C21A                                    | Plasmid for PotA protein modification that results in its degradation                        | This study                |

| <b>Suppl. Table S2. Assays testing the inhibition of human and murine MMPs by PotA.</b> |                                       |                                           |                                      |                                      |
|-----------------------------------------------------------------------------------------|---------------------------------------|-------------------------------------------|--------------------------------------|--------------------------------------|
|                                                                                         | Human catalytic domain                | Human full-length enzyme                  | Mouse catalytic domain               | Mouse full-length enzyme             |
| MMP-1                                                                                   | –                                     | No inhibition                             | –                                    | –                                    |
| MMP-2                                                                                   | –                                     | No inhibition                             | –                                    | –                                    |
| MMP-3                                                                                   | –                                     | No inhibition                             | –                                    | –                                    |
| MMP-7                                                                                   | –                                     | No inhibition                             | –                                    | –                                    |
| MMP-8                                                                                   | –                                     | Weak inhibition<br>$K_i > 100$ nM         | –                                    | –                                    |
| MMP-9                                                                                   | –                                     | No inhibition                             | –                                    | –                                    |
| MMP-10                                                                                  | –                                     | Weak inhibition<br>$K_i > 100$ nM         | –                                    | –                                    |
| MMP-12                                                                                  | Strong inhibition<br>$K_i \sim 10$ nM | Strong inhibition<br>$K_i \sim 10$ nM     | Strong inhibition<br>$K_i \sim 5$ nM | Strong inhibition<br>$K_i \sim 5$ nM |
| MMP-13                                                                                  | –                                     | Very weak inhibition<br>$K_i > 1$ $\mu$ M | –                                    | –                                    |
| MMP-14                                                                                  | –                                     | No inhibition                             | –                                    | –                                    |
| MMP-20                                                                                  | Weak inhibition<br>$K_i > 100$ nM     | –                                         | –                                    | –                                    |

Suppl. Table S3. Crystallographic data.

| Dataset                                                                             | PotA                                                         | PotA:karilysin                                                      | PotA:MMP-12                                                   | PotC:mirolase                                                                                       | PotD F <sup>52</sup> M (SeMet)                  | PotE (SeMet)                          | PotE                               |
|-------------------------------------------------------------------------------------|--------------------------------------------------------------|---------------------------------------------------------------------|---------------------------------------------------------------|-----------------------------------------------------------------------------------------------------|-------------------------------------------------|---------------------------------------|------------------------------------|
| Synchrotron / beamline                                                              | ESRF / ID-23-1                                               | ALBA / XALOC                                                        | ALBA / XALOC                                                  | ALBA / XALOC                                                                                        | ALBA / XALOC                                    | ALBA / XALOC                          | ALBA / XALOC                       |
| Space group / protomers or complexes per a.u. <sup>a</sup>                          | P3 <sub>1</sub> 21 / 1                                       | P2 <sub>1</sub> 2 <sub>1</sub> 2 <sub>1</sub> / 1                   | P2 <sub>1</sub> 2 <sub>1</sub> 2 <sub>1</sub> / 2             | P2 <sub>1</sub> / 1                                                                                 | P2 <sub>1</sub> / 6                             | P2 <sub>1</sub> / 2                   | C2 / 1                             |
| Cell axes (a, b, c in Å)                                                            | 76.21, 76.21, 30.52                                          | 38.24, 62.94, 108.68                                                | 54.41, 63.00, 135.37                                          | 45.66, 113.36, 50.20                                                                                | 70.96, 78.15, 71.46                             | 37.13, 71.35, 39.15                   | 86.92, 36.56, 37.16                |
| Cell angles (α, β, γ in °)                                                          | 90, 90, 120                                                  | 90, 90, 90                                                          | 90, 90, 90                                                    | 90, 112.7, 90                                                                                       | 90, 117.8, 90                                   | 90, 89.9, 90                          | 90, 105.6, 90                      |
| Wavelength (Å)                                                                      | 0.97918                                                      | 0.97926                                                             | 0.97926                                                       | 0.97950                                                                                             | 0.97926                                         | 0.97919                               | 0.97925                            |
| Measurements / unique reflections                                                   | 216,001 / 11,454                                             | 715,341 / 57,705                                                    | 424,940 / 40,486                                              | 1,153,014 / 184,353                                                                                 | 181,967 / 27,047                                | 45,003 / 25,564 <sup>b</sup>          | 63,917 / 10,402                    |
| Resolution range (Å) (outermost shell) <sup>b</sup>                                 | 65.9-1.70 (1.80-1.70)                                        | 62.9-1.35 (1.42-1.35)                                               | 67.7-1.85 (1.96-1.85)                                         | 42.9-1.10 (1.17-1.10)                                                                               | 63.2-2.40 (2.55-2.40)                           | 71.3-2.00 (2.11-2.00)                 | 41.9-1.80 (1.91-1.80)              |
| Completeness (%)                                                                    | 100.0 (99.9)                                                 | 98.6 (97.2)                                                         | 99.9 (99.3)                                                   | 96.9 (83.0)                                                                                         | 99.2 (98.9)                                     | 94.2 (95.3)                           | 98.1 (91.4)                        |
| R <sub>merge</sub> <sup>c</sup>                                                     | 0.114 (1.379)                                                | 0.060 (0.767)                                                       | 0.097 (0.835)                                                 | 0.052 (0.650)                                                                                       | 0.147 (1.517)                                   | 0.060 (0.430)                         | 0.052 (0.492)                      |
| R <sub>r.i.m.</sub> [= R <sub>meas</sub> ] <sup>d</sup> / CC(1/2) in % <sup>d</sup> | 0.117 (1.423) / 100 (83)                                     | 0.063 (0.800) / 100 (90)                                            | 0.102 (0.878) / 100 (90)                                      | 0.057 (0.740) / 100 (79)                                                                            | 0.159(1.639) / 100 (78)                         | 0.083(0.589) / 100 (72)               | 0.057(0.560) / 100 (88)            |
| Average intensity <sup>e</sup>                                                      | 17.1 (2.6)                                                   | 20.8 (3.5)                                                          | 14.3 (3.8)                                                    | 18.2 (2.2)                                                                                          | 11.1 (2.4)                                      | 8.7 (2.1)                             | 21.2 (3.2)                         |
| B-Factor (Wilson) (Å <sup>2</sup> ) / Aver. multiplicity                            | 31.5 / 18.9                                                  | 21.9 / 12.4                                                         | 36.7 / 10.5                                                   | 13.8 / 6.3                                                                                          | 61.4 / 6.7                                      | 35.0 / 1.8                            | 30.1 / 6.1                         |
| Number of heavy-atom sites used for phasing / f.o.m.                                | -                                                            | -                                                                   | -                                                             | -                                                                                                   | -                                               | 4 / 0.29 0.59                         | -                                  |
| Resolution range used for refinement (Å)                                            | 66.0 – 1.70                                                  | 36.1 – 1.35                                                         | 67.7 – 1.85                                                   | 42.9 – 1.10                                                                                         | 63.2 – 2.40                                     | 37.3 – 2.00                           | 35.8 – 1.80                        |
| Reflections used (test set)                                                         | 10,873 (578)                                                 | 56,942 (762)                                                        | 39,686 (798)                                                  | 183,591 (761)                                                                                       | 26,453 (531)                                    | 13,070 (658) <sup>b</sup>             | 9852 (549)                         |
| Crystallographic R <sub>factor</sub> (free R <sub>factor</sub> ) <sup>c</sup>       | 0.177 (0.214)                                                | 0.154 (0.171)                                                       | 0.190 (0.228)                                                 | 0.139 (0.148)                                                                                       | 0.218 (0.236)                                   | 0.193 (0.251)                         | 0.184 (0.201)                      |
| Non-H protein atoms / solvent molecules / ligands per a.u.                          | 760 / 146 / 1 Ni <sup>2+</sup>                               | 2090 / 305 / 2 Zn <sup>2+</sup> , 1 Ca <sup>2+</sup> , 1 MES, 2 GOL | 3947 / 276 / 4 Zn <sup>2+</sup> , 6 Ca <sup>2+</sup>          | 3618 / 752 / Na <sup>+</sup> , 6 Ca <sup>2+</sup> , 8 GOL, 2 EDO                                    | 4944 / 66 / 1 EDO                               | 1605 / 107 / 2 GOL                    | 850 / 88 / 1 EPE                   |
| R <sub>msd</sub> from target values                                                 |                                                              |                                                                     |                                                               |                                                                                                     |                                                 |                                       |                                    |
| bonds (Å)/angles (°)                                                                | 0.010 / 1.12                                                 | 0.010 / 1.07                                                        | 0.009 / 0.99                                                  | 0.008 / 1.02                                                                                        | 0.009 / 1.20                                    | 0.010 / 1.07                          | 0.010 / 0.95                       |
| Average B-factor (Å <sup>2</sup> )                                                  | 33.0                                                         | 22.3                                                                | 41.0                                                          | 14.5                                                                                                | 61.0                                            | 34.0                                  | 30.3                               |
| All-atom contacts and geometry analysis <sup>f</sup>                                |                                                              |                                                                     |                                                               |                                                                                                     |                                                 |                                       |                                    |
| Ramachandran favoured / outliers / all <sup>g</sup>                                 | 95 / 0 / 97                                                  | 255 / 0 / 261                                                       | 491 / 0 / 477                                                 | 500 / 0 / 488                                                                                       | 559 / 0 / 587                                   | 178 / 0 / 182                         | 100 / 0 / 98                       |
| Protein bond-length / bond-angle / chiral. / planar. outliers                       | 0 / 0 / 0 / 0                                                | 0 / 0 / 0 / 0                                                       | 0 / 0 / 0 / 0                                                 | 0 / 0 / 0 / 1                                                                                       | 0 / 0 / 0 / 0                                   | 0 / 0 / 0 / 0                         | 0 / 0 / 0 / 0                      |
| Side-chain outliers                                                                 | 0                                                            | 2                                                                   | 15                                                            | 0                                                                                                   | 16                                              | 2                                     | 2                                  |
| All-atom clashscore                                                                 | 0.0                                                          | 0.2                                                                 | 0.5                                                           | 0.1                                                                                                 | 6.3                                             | 0.3                                   | 2.2                                |
| RSRZ outliers / F <sub>obs</sub> :F <sub>calc</sub> correlation                     | 4 / 0.96                                                     | 6 / 0.97                                                            | 13 / 0.93                                                     | 14 / 0.97                                                                                           | 17 / 0.95                                       | 4 / 0.95                              | 3 / 0.94                           |
| PDB access code                                                                     | 8B2M                                                         | 8B2Q                                                                | 8B2N                                                          | 8EHE                                                                                                | 8EHB                                            | 8EHC                                  | 8EHD                               |
| Crystallization conditions (reservoir buffer)                                       | 20% PEG 2000, 10 μM nickel chloride, 100 mM Tris-HCl, pH 8.5 | 25% PEG 6000, 100 mM MES, pH 6.0                                    | 30% PEG 3000, 200 mM sodium chloride, 100 mM Tris-HCl, pH 7.0 | 19% PEG MME 2000 in 100 mM succinic acid, sodium dihydrogen phosphate and glycine at 2:7:7 (pH 8.0) | 20% PEG 3350, 0.2 M diammonium hydrogen citrate | 20% PEG 1000, 100 mM Tris-HCl, pH 8.5 | 20% PEG 8000, 100 mM HEPES, pH 7.5 |

<sup>a</sup> Abbreviations: a.u., asymmetric unit; EDO, ethylene glycol; EPE, 2-[4-(2-hydroxyethyl)piperazin-1-yl]ethanesulfonic acid (HEPES); f.o.m., mean figure of merit before and after density modification plus averaging; GOL, glycerol; MES, 2-(N-morpholino)ethanesulfonic acid; MME, monomethyl ether; PEG, polyethylene glycol; RSRZ, real-space R-value Z-score; and Tris, 2-amino-2(hydroxymethyl)propane-1,3-diol. <sup>b</sup> Values in parentheses refer to the outermost resolution shell. <sup>c</sup> For definitions, see Table 1 in <sup>24</sup>. <sup>d</sup> For definitions, see <sup>25,26</sup>. <sup>e</sup> Average intensity is  $\langle I/\sigma(I) \rangle$  of unique reflections after merging according to the XDS program <sup>27</sup>. <sup>f</sup> According to the PDB Validation Service (<https://validate.rcsb-1.wwpdb.org/validservice/>). <sup>g</sup> Including residues with alternate main-chain conformations. <sup>h</sup> Friedel mates were kept separately for phasing but merged for refinement.

| <b>Suppl. Table S4. Homology model validation.</b>      |                     |                     |                              |                               |
|---------------------------------------------------------|---------------------|---------------------|------------------------------|-------------------------------|
|                                                         | <b><i>PotB1</i></b> | <b><i>PotB2</i></b> | <b><i>PotD:mirolysin</i></b> | <b><i>PotE:forsilysin</i></b> |
| MolProbity Score                                        | 1.15                | 1.18                | 1.69                         | 2.96                          |
| Clash score                                             | 0.52                | 0.51                | 4.3                          | 15.1                          |
| Ramachandran favoured                                   | 92%                 | 92%                 | 97%                          | 91%                           |
| Ramachandran outliers                                   | 2 (2%)              | 4 (3%)              | 1 (0%)                       | 10 (2%)                       |
| Rotamer outliers                                        | 0 (0%)              | 0 (0%)              | 8 (2%)                       | 37 (10%)                      |
| C $\beta$ deviations                                    | 0                   | 0                   | 0                            | 0                             |
| Bad bonds (out of total)                                | 0 (996)             | 0 (1016)            | 0 (3060)                     | 0 (3549)                      |
| Bad angles (out of total)                               | 2 (1349)            | 0 (1374)            | 6 (4155)                     | 0 (4826)                      |
| Results obtained with <i>Molprobity</i> <sup>28</sup> . |                     |                     |                              |                               |



| <b>Suppl. Table S5. Root-mean square deviations (<i>rmsd</i>) upon pairwise superposition of potempins.</b> |                     |                    |
|-------------------------------------------------------------------------------------------------------------|---------------------|--------------------|
|                                                                                                             | <b><i>PotC</i></b>  | <b><i>PotD</i></b> |
| <b><i>PotA</i></b>                                                                                          | 2.05 Å (46)         | 1.64 Å (62)        |
| <b><i>PotC</i></b>                                                                                          |                     | 2.54 Å (57)        |
|                                                                                                             | <b><i>PotB2</i></b> | <b><i>PotE</i></b> |
| <b><i>PotB1</i></b>                                                                                         | 3.46 Å (111)        | 1.80 Å (67)        |
| <b><i>PotB2</i></b>                                                                                         |                     | 1.99 Å (67)        |

Listed are the respective *rmsd* values and the number of superposed C $\alpha$  atoms (in parenthesis) of OB-fold potempins (*PotA*, *PotC* and *PotD*) and  $\beta$ -hairpin-repeat barrels (*PotB1*, *PotB2* and *PotE*). Results obtained with *Lsqkab*<sup>29</sup>.

| <b>Suppl. Table S6. Calcium-binding sites in mirolase.</b>                                                                                                                                                                                                                                                                                                                                                                                                                                                                 |                        |                                                                                                                                                     |                                                                |                  |                                                                    |
|----------------------------------------------------------------------------------------------------------------------------------------------------------------------------------------------------------------------------------------------------------------------------------------------------------------------------------------------------------------------------------------------------------------------------------------------------------------------------------------------------------------------------|------------------------|-----------------------------------------------------------------------------------------------------------------------------------------------------|----------------------------------------------------------------|------------------|--------------------------------------------------------------------|
| Site                                                                                                                                                                                                                                                                                                                                                                                                                                                                                                                       | Coordination           | In-plane ligands                                                                                                                                    | Apical ligands                                                 | Distances to ion | Observations                                                       |
| 1                                                                                                                                                                                                                                                                                                                                                                                                                                                                                                                          | Pentagonal bipyramidal | T <sub>271</sub> O<br>T <sub>271</sub> O $\gamma$ 1<br>D <sub>276</sub> O $\delta$ 1<br>Solvent<br>S <sup>68</sup> O $\gamma$ 1 <sup>a</sup>        | Y <sub>273</sub> O<br>D <sub>278</sub> O $\delta$ 2            | 2.29–2.45 Å      |                                                                    |
| 2                                                                                                                                                                                                                                                                                                                                                                                                                                                                                                                          | Octahedral + 1         | D <sub>209</sub> O $\delta$ 1 and O $\delta$ 2 <sup>c</sup><br>N <sub>211</sub> O $\delta$ 1<br>2 x Solvent                                         | N <sub>207</sub> O $\delta$ 1<br>Solvent                       | 2.23–2.58 Å      |                                                                    |
| 3                                                                                                                                                                                                                                                                                                                                                                                                                                                                                                                          | Octahedral + 1         | D <sub>187</sub> O $\delta$ 2<br>D <sub>239</sub> O $\delta$ 1 and O $\delta$ 2 <sup>c</sup><br>N <sub>296</sub> O $\delta$ 1<br>I <sub>300</sub> O | N <sub>294</sub> O<br>M <sub>298</sub> O                       | 2.31–2.54 Å      | Shared with subtilisins Carlsberg and Novo, and kexin <sup>b</sup> |
| 4                                                                                                                                                                                                                                                                                                                                                                                                                                                                                                                          | Octahedral             | L <sub>513</sub> O<br>S <sub>515</sub> O<br>G <sub>517</sub> O<br>Solvent                                                                           | D <sub>512</sub> O $\delta$ 1<br>D <sub>519</sub> O $\delta$ 2 | 2.26–2.35 Å      |                                                                    |
| 5                                                                                                                                                                                                                                                                                                                                                                                                                                                                                                                          | Octahedral             | D <sub>457</sub> O $\delta$ 2<br>R <sub>458</sub> O<br>G <sub>460</sub> O<br>N <sub>465</sub> O                                                     | F <sub>462</sub> O<br>T <sub>467</sub> O                       | 2.31–2.34 Å      |                                                                    |
| 6                                                                                                                                                                                                                                                                                                                                                                                                                                                                                                                          | Octahedral             | T <sub>420</sub> O $\gamma$ 1<br>D <sub>441</sub> O $\delta$ 2<br>2 x Solvent <sup>d</sup>                                                          | V <sub>418</sub> O<br>S <sub>439</sub> O                       | 2.32–2.43 Å      | Shared with subtilisins Carlsberg and Novo, and kexin <sup>b</sup> |
| <sup>a</sup> Ligand provided by PotC, probably replaced by a solvent in unbound mirolase.<br><sup>b</sup> See PDB entries 1R64 (three potassium and three calcium sites), 2SNI (two calcium sites), 1SBT (no site), 1SBC (one calcium site), 2SEC (three calcium sites) and 3COO (four zinc sites).<br><sup>c</sup> Bidentate ligand, slightly larger distances than standard (2.36–2.39 Å, see <sup>30</sup> ).<br><sup>d</sup> One of the two solvent ligands is disordered and was modelled in two alternate positions. |                        |                                                                                                                                                     |                                                                |                  |                                                                    |

#### 4. SUPPLEMENTARY REFERENCES

1. M. Książek, A. Y. Karim, D. Bryzek, J. J. Enghild, I. B. Thøgersen, J. Koziel and J. Potempa, *Biol. Chem.*, 2015, **396**, 261-275.
2. N. D. Rawlings, A. J. Barrett and R. Finn, *Nucleic Acids Res.*, 2016, **44**, D343-D350.
3. K. Linderstrøm-Lang and M. Ottesen, *Nature*, 1947, **159**, 807-808.
4. I. Schechter and A. Berger, *Biochem. Biophys. Res. Commun.*, 1967, **27**, 157-162.
5. C. A. McPhalen and M. N. G. James, *Biochemistry*, 1988, **27**, 6582-6598.
6. F. X. Gomis-Rüth, T. O. Botelho and W. Bode, *Biochim. Biophys. Acta*, 2012, **1824**, 157-163.
7. H. Grøn, M. Meldal and K. Breddam, *Biochemistry*, 1992, **31**, 6011-6018.
8. T. Gallagher, G. Gilliland, L. Wang and P. Bryan, *Structure*, 1995, **3**, 907-914.
9. C. Tallant, R. García-Castellanos, J. Seco, U. Baumann and F. X. Gomis-Rüth, *J. Biol. Chem.*, 2006, **281**, 17920-17928.
10. A. Y. Karim, M. Kulczycka, T. Kantyka, G. Dubin, A. Jabaiah, P. S. Daugherty, I. B. Thøgersen, J. J. Enghild, K. A. Nguyen and J. Potempa, *Biol. Chem.*, 2010, **391**, 105-117.
11. T. Goulas, J. L. Arolas and F. X. Gomis-Rüth, *Proc. Natl. Acad. Sci. USA*, 2011, **108**, 1856-1861.
12. S. Trillo-Muyo, S. Martínez-Rodríguez, J. L. Arolas and F. X. Gomis-Rüth, *Chem. Sci.*, 2013, **4**, 791-797.
13. M. Książek, D. Mizgalska, S. Eick, I. B. Thøgersen, J. J. Enghild and J. Potempa, *Front. Microbiol.*, 2015, **6**, 312.
14. J. L. Arolas, T. Goulas, A. P. Pomerantsev, S. H. Leppla and F. X. Gomis-Rüth, *Structure*, 2016, **24**, 25-36.
15. J. S. Richardson, *Adv. Prot. Chem.*, 1981, **34**, 167-339.
16. C. S. Wright, R. A. Alden and J. Kraut, *Nature*, 1969, **221**, 235-242.
17. D. J. Neidhart and G. A. Petsko, *Prot. Eng.*, 1988, **2**, 271-276.
18. T. Gallagher, B. Ruan, M. London, M. A. Bryan and P. N. Bryan, *Biochemistry*, 2009, **48**, 10389-10394.
19. W. Bode, E. Papamokos, D. Musil, U. Seemueller and H. Fritz, *EMBO J.*, 1986, **5**, 813-818.
20. P. K. Madala, J. D. A. Tyndall, T. Nall and D. P. Fairlie, *Chem. Rev.*, 2010, **110**, PR1-PR31.
21. L. Acuña-Amador, A. Primot, E. Cadieu, A. Roulet and F. Barloy-Hubler, *BMC genomics*, 2018, **19**, 54.
22. M. Jusko, J. Potempa, D. Mizgalska, E. Bielecka, M. Książek, K. Riesbeck, P. Garred, S. Eick and A. M. Blom, *J. Immunol.*, 2015, **195**, 2231-2240.
23. D. Mizgalska, T. Goulas, A. Rodríguez-Banqueri, F. Veillard, M. Madej, E. Małecka, K. Szczesniak, M. Książek, M. Widziółek, T. Guevara, U. Eckhard, M. Solà, J. Potempa and F. X. Gomis-Rüth, *Proc. Natl. Acad. Sci. USA*, 2021, **118**, e2103573118.
24. R. García-Castellanos, A. Marrero, G. Mallorquí-Fernández, J. Potempa, M. Coll and F. X. Gomis-Rüth, *J. Biol. Chem.*, 2003, **278**, 39897-39905.
25. M. S. Weiss, *J. Appl. Cryst.*, 2001, **34**, 130-135.
26. P. A. Karplus and K. Diederichs, *Science*, 2012, **336**, 1030-1033.
27. W. Kabsch, *Acta Crystallogr. sect. D*, 2010, **66**, 125-132.
28. C. J. Williams, J. J. Headd, N. W. Moriarty, M. G. Prisant, L. L. Videau, L. N. Deis, V. Verma, D. A. Keedy, B. J. Hintze, V. B. Chen, S. Jain, S. M. Lewis, W. B. Arendall 3rd, J. Snoeyink, P. D. Adams, S. C. Lovell, J. S. Richardson and D. C. Richardson, *Protein Sci.*, 2018, **27**, 293-315.
29. W. Kabsch, *Acta Crystallogr. sect. A*, 1976, **32**, 922-923.
30. M. M. Harding, *Acta Crystallogr. sect. D*, 2006, **62**, 678-682.
